## Addendum

**Addendum: *ROS1-GOPC/FIG*: a novel gene fusion in hepatic angiosarcoma****Eric I. Marks<sup>1,\*</sup>, Sahithi Pamarthy<sup>2,\*</sup>, Don Dizon<sup>1</sup>, Ari Birnbaum<sup>1</sup>, Evgeny Yakirevich<sup>3</sup>, Howard Safran<sup>1</sup> and Benedito A. Carneiro<sup>1</sup>**<sup>1</sup>Division of Hematology-Oncology, Lifespan Cancer Institute, Warren-Alpert Medical School of Brown University, Providence, RI, USA<sup>2</sup>Atrin Pharmaceuticals, Pennsylvania Biotechnology Center, Doylestown, PA, USA<sup>3</sup>Department of Pathology, Lifespan Cancer Institute, Warren-Alpert Medical School of Brown University, Providence, RI, USA

\*These authors contributed equally to this work

**Published:** May 26, 2023**Copyright:** © 2023 Marks et al. This is an open access article distributed under the terms of the [Creative Commons Attribution License](#) (CC BY 3.0), which permits unrestricted use, distribution, and reproduction in any medium, provided the original author and source are credited.**This article has an addendum:** Informed patient consent to an IRB-approved research protocol was obtained.Original article: Oncotarget. 2019; 10:245–251. <https://doi.org/10.18632/oncotarget.26521>
